# Supplementary material for: A cooperative model for metallocene catalyst activation by methylaluminoxane
Source: Royal Society of Chemistry journal article supplement (doi:10.1039/d4dt03124e), 2024-12-23
Supplement: d4dt03124e1.pdf [file d4dt03124e1.pdf]

# Supporting Information for A Cooperative Model for Metallocene Catalyst Activation by Methylaluminumoxane

Dr. Scott Collins, Prof. Mikko Linnolahti

Department of Chemistry, University of Eastern Finland, Joensuu Campus, Yliopistokatu 7, FI-80100, Joensuu, Finland.

## Contents

|                                                                                                                                                                                                                                                                                                                 |   |
|-----------------------------------------------------------------------------------------------------------------------------------------------------------------------------------------------------------------------------------------------------------------------------------------------------------------|---|
| Table S-1 Energies for Structures Reported <sup>a</sup> .....                                                                                                                                                                                                                                                   | 1 |
| Figure S-1 - Electrostatic potential surfaces of the [7,4] <sup>-</sup> anion showing negative charge localized differently to each face and top edge of sheet. Right – Mulliken charges with terminal Me group highlighted as being most negative (-0.799). That group is circled in the middle picture. ....  | 3 |
| Figure S-2 - Electrostatic potential surfaces of the [26,8] <sup>-</sup> anion showing negative charge localized to each face and top edge of sheet. Right – Mulliken charges with terminal Me group highlighted as being most negative (-1.013).....                                                           | 3 |
| Figure S-3 - Electrostatic potential surface of the [13,8] <sup>-</sup> anion showing the most electron rich face. Centre – Mulliken charges with several exposed, terminal Me groups highlighted. Right – Gaussian input file with [SBIZrMe] <sup>+</sup> cation placed above the most electron rich face..... | 3 |

Table S-1 Energies for Structures Reported<sup>a</sup>

| Structure <sup>b</sup>                          | E             | H             | H-qh          | TS-tr    | TS-qh-tr |
|-------------------------------------------------|---------------|---------------|---------------|----------|----------|
| C <sub>3</sub> H <sub>6</sub>                   | -117.878183   | -117.793937   | -117.793942   | 0.023788 | 0.023788 |
|                                                 | -117.782651   | -117.698852   | -117.698857   | 0.023839 | 0.023839 |
| AlMe <sub>3</sub> C <sub>3h</sub>               | -362.140460   | -362.024446   | -362.025875   | 0.036047 | 0.034694 |
|                                                 | -361.974980   | -361.860048   | -361.861630   | 0.037565 | 0.034916 |
| Al <sub>2</sub> Me <sub>6</sub> C <sub>2v</sub> | -724.314410   | -724.079599   | -724.081892   | 0.054038 | 0.053323 |
|                                                 | -723.987850   | -723.754997   | -723.757140   | 0.053883 | 0.053227 |
| SBIZrMe <sub>2</sub>                            | -1189.238147  | -1188.824312  | -1188.826836  | 0.070837 | 0.069246 |
|                                                 | -1188.521689  | -1188.110250  | -1188.112741  | 0.070868 | 0.069373 |
| n6m4                                            | -3595.040208  | -3594.288773  | -3594.299951  | 0.152287 | 0.143350 |
|                                                 | -3593.562769  | -3592.818476  | -3592.829337  | 0.152489 | 0.143289 |
| n7m5                                            | -4314.959611  | -4314.042318  | -4314.054397  | 0.174046 | 0.165779 |
|                                                 | -4313.189059  | -4312.280424  | -4312.291396  | 0.171414 | 0.165035 |
| n26m9                                           | -12560.677149 | -12558.396156 | -12558.428074 | 0.409009 | 0.382067 |
|                                                 | -9086.022396  | -9084.149019  | -9084.174417  | 0.325863 | 0.302539 |
| <b>2a</b>                                       | -9082.135703  | -9080.279223  | -9080.303617  | 0.324664 | 0.303217 |
|                                                 | -9448.179901  | -9446.187904  | -9446.214605  | 0.342228 | 0.317484 |
| <b>3a</b>                                       | -9444.141304  | -9442.167495  | -9442.193650  | 0.343309 | 0.319595 |
|                                                 | -5142.053697  | -5140.838970  | -5140.854508  | 0.210555 | 0.196120 |
| <b>2b</b>                                       | -5139.731508  | -5138.526696  | -5138.542029  | 0.210543 | 0.196813 |
|                                                 | -5504.206768  | -5502.873463  | -5502.890969  | 0.230185 | 0.213948 |
| <b>3b</b>                                       | -5501.728391  | -5500.406035  | -5500.422967  | 0.229773 | 0.213880 |
|                                                 | -4784.301049  | -4783.132799  | -4783.147577  | 0.202264 | 0.188026 |
| <b>2c</b>                                       | -4782.116060  | -4780.957689  | -4780.971923  | 0.201541 | 0.188693 |

|                                                           |                     |                     |                     |                 |                 |
|-----------------------------------------------------------|---------------------|---------------------|---------------------|-----------------|-----------------|
| <b>3c</b>                                                 | -5146.463282        | -5145.176566        | -5145.193404        | 0.219733        | 0.204612        |
|                                                           | <i>-5144.122715</i> | <i>-5142.846509</i> | <i>-5142.863152</i> | <i>0.220854</i> | <i>0.205342</i> |
| <b>2d</b>                                                 | -13387.779277       | -13385.200584       | -13385.235589       | 0.445130        | 0.411815        |
| <b>3d</b>                                                 | -13749.938665       | -13747.241356       | -13747.277736       | 0.461403        | 0.426897        |
| <b>2e</b>                                                 | -8737.107133        | -8735.137494        | -8735.165499        | 0.343991        | 0.313835        |
|                                                           | <i>-8733.312316</i> | <i>-8731.360215</i> | <i>-8731.387708</i> | <i>0.344919</i> | <i>0.314969</i> |
| <b>3e</b>                                                 | -9099.271337        | -9097.184180        | -9097.214484        | 0.366013        | 0.331712        |
|                                                           | <i>-9095.322466</i> | <i>-9093.253551</i> | <i>-9093.282577</i> | <i>0.362788</i> | <i>0.331261</i> |
| <b>2b</b> $\pi$ -C <sub>3</sub> H <sub>6</sub> <i>syn</i> | -5259.932767        | -5258.630332        | -5258.646842        | 0.220962        | 0.206463        |
| <b>2b</b> TS <i>syn</i>                                   | -5259.909891        | -5258.607704        | -5258.624348        | 0.221115        | 0.203723        |
| <b>2c</b> TS <i>syn</i>                                   | -4902.160573        | -4900.905315        | -4900.921598        | 0.214944        | 0.196058        |
| <b>2d</b> TS <i>syn</i>                                   | -13505.642635       | -13502.976612       | -13503.012274       | 0.450175        | 0.418197        |
| <b>2e</b> $\pi$ -C <sub>3</sub> H <sub>6</sub> <i>syn</i> | -8854.997093        | -8852.942430        | -8852.972383        | 0.357818        | 0.325312        |
| <b>2e</b> TS <i>syn</i>                                   | -8854.979055        | -8852.922956        | -8852.952742        | 0.356421        | 0.322087        |
| <b>2e</b> $\gamma$ -CH                                    | -8854.993756        | -8852.935725        | -8852.965787        | 0.358580        | 0.323545        |
| <b>2f</b> SBIZrMe- $\mu$ -Me-cage-16,6                    | -9086.034106        | -9084.157091        | -9084.178405        | 0.308512        | 0.289302        |
| <b>2f</b> TS <i>syn</i> <sup>c</sup>                      | -9203.889020        | -9201.923878        | -9201.944868        | 0.310554        | 0.292475        |

a. M06-2X/TZVP energies in atomic units at 298.15 K in toluene PCM with MN15/def2-TZVP results in italics. Note that G-tr = H-TS-tr and G-qh-tr = H-qh-TS-qh-tr where those values were used to calculate  $\Delta G$ -tr and  $\Delta G$ -qh-tr values in Tables 1-3. b. For coordinate files, see electronic supporting information Table S-1.xyz. For coordinate and energy data for C<sub>3</sub>H<sub>6</sub>, AlMe<sub>3</sub>, Al<sub>2</sub>Me<sub>6</sub>, SBIZrMe<sub>2</sub>, **2a**, **3a**, insertion intermediates and the transition structure corresponding to CIP **2a** listed in Table 1 see S. Collins, M. Linnolahti, *ChemPhysChem* **2024**, *25*, e202300856 and its Supporting Information. c. The insertion barrier for this 16,6 cage structure (S. Collins, M. Linnolahti, *ChemPhysChem* **2023**, *24*, e202300342) is  $\Delta E^\ddagger = 61.1$  and  $\Delta G^\ddagger$ -qh-tr = 126.3 kJ mol<sup>-1</sup>.

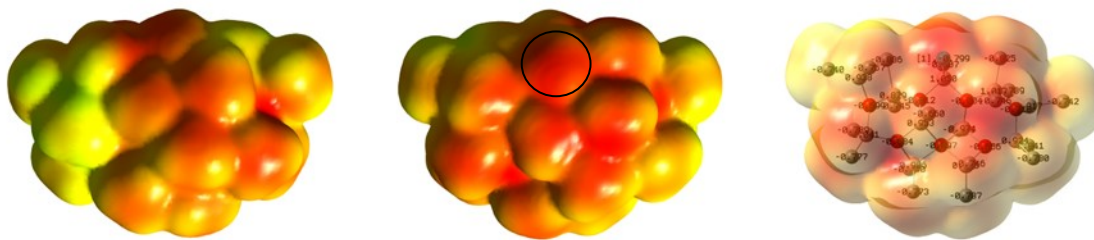

Figure S-1 - Electrostatic potential surfaces of the  $[7,4]^-$  anion showing negative charge localized differently to each face and top edge of sheet. Right – Mulliken charges with terminal Me group highlighted as being most negative (-0.799). That group is circled in the middle picture.

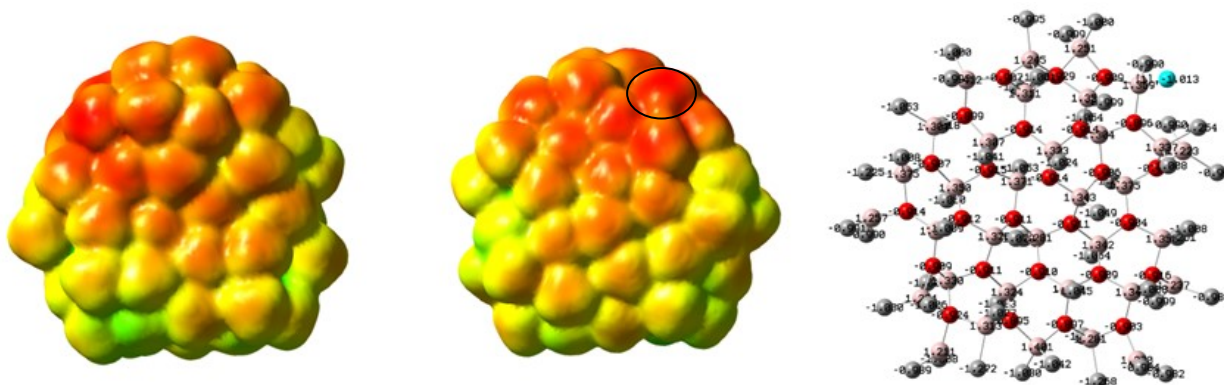

Figure S-2 - Electrostatic potential surfaces of the  $[26,8]^-$  anion showing negative charge localized to each face and top edge of sheet. Right – Mulliken charges with terminal Me group highlighted as being most negative (-1.013).

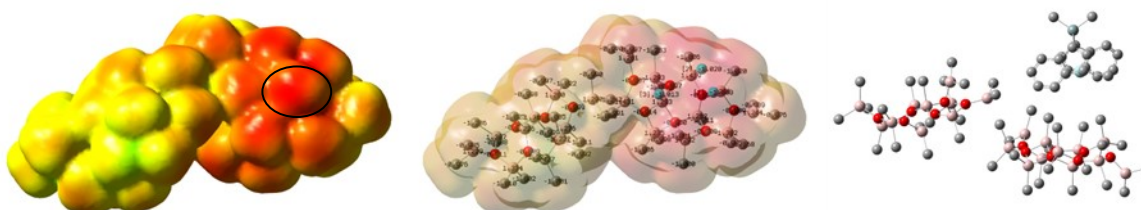

Figure S-3 - Electrostatic potential surface of the  $[13,8]^-$  anion showing the most electron rich face. Centre – Mulliken charges with several exposed, terminal Me groups highlighted. Right – Gaussian input file with  $[SBIZrMe]^+$  cation placed above the most electron rich face.
